# Supplementary material for: The CCEDRRN COVID-19 Mortality Score to predict death among nonpalliative patients with COVID-19 presenting to emergency departments: a derivation and validation study
Source: PubMed Central journal article supplement — CMAJ Open. 2022 Feb 8;10(1):E90–9. doi: 10.9778/cmajo.20210243 (PMC9259439; doi:10.9778/cmajo.20210243), 2022-02-08

## Appendix 1: Supplemental material

**Table S1.** Characteristics and enrolment periods for participating sites

| Hospital                          | Province | Start Date   | End Date     | Hospital Type |          | Derivation cohort | Validation cohort |
|-----------------------------------|----------|--------------|--------------|---------------|----------|-------------------|-------------------|
|                                   |          |              |              | Rural/Urban   | Teaching | n                 | n                 |
| Vancouver General Hospital        | BC       | Mar 1, 2020  | Jun 30, 2020 | Urban         | Teaching | 91                |                   |
| Lions Gate Hospital               | BC       | Mar 1, 2020  | Sep 19, 2020 | Urban         | NT       |                   | 142               |
| Saint Paul's Hospital             | BC       | Mar 1, 2020  | Mar 20, 2020 | Urban         | Teaching |                   | 59                |
| Mount St Joseph's Hospital        | BC       | Mar 1, 2020  | Oct 31, 2020 | Urban         | NT       |                   | 90                |
| Surrey Memorial Hospital          | BC       | Mar 19, 2020 | Sep 20, 2020 | Urban         | Teaching | 895               |                   |
| Royal Columbian Hospital          | BC       | Mar 1, 2020  | Nov 15, 2020 | Urban         | Teaching | 221               |                   |
| Abbotsford Regional Hospital      | BC       | Apr 20, 2020 | Jul 15, 2020 | Urban         | NT       | 329               |                   |
| Eagle Ridge Hospital              | BC       | Mar 1, 2020  | Nov 30, 2020 | Urban         | NT       | 162               |                   |
| Royal Inland Hospital             | BC       | Mar 1, 2020  | Nov 30, 2020 | Urban         | NT       | 35                |                   |
| Kelowna General Hospital          | BC       | Mar 1, 2020  | Nov 2, 2020  | Urban         | Teaching | 105               |                   |
| University of Alberta Hospital    | AB       | Apr 8, 2020  | Oct 5, 2020  | Urban         | Teaching | 263               |                   |
| Foothills Medical Centre          | AB       | Mar 1, 2020  | Oct 14, 2020 | Urban         | Teaching | 511               |                   |
| Rockyview General Hospital        | AB       | Mar 1, 2020  | Oct 24, 2020 | Urban         | Teaching |                   | 446               |
| Peter Lougheed Centre             | AB       | Mar 1, 2020  | Oct 17, 2020 | Urban         | Teaching | 829               |                   |
| South Health Campus               | AB       | Mar 1, 2020  | Oct 17, 2020 | Urban         | Teaching |                   | 329               |
| Royal Alexandra Hospital          | AB       | Mar 1, 2020  | May 7, 2020  | Urban         | Teaching |                   | 180               |
| Northeast Community Health Centre | AB       | Mar 1, 2020  | Nov 06, 2020 | Urban         | Teaching | 115               |                   |
| St Paul's Hospital                | SK       | Mar 17, 2020 | Dec 5, 2020  | Urban         | Teaching |                   | 149               |
| Royal University Hospital         | SK       | Mar 17, 2020 | Sep 20, 2020 | Urban         | Teaching | 33                |                   |
| Saskatoon City Hospital           | SK       | Mar 17, 2020 | Nov 17, 2020 | Urban         | Teaching | 42                |                   |
| Sunnybrook Hospital               | ON       | May 14, 2020 | Jul 31, 2020 | Urban         | Teaching |                   | 86                |
| The Ottawa Hospital - Civic       | ON       | Mar 1, 2020  | Nov 30, 2020 | Urban         | Teaching | 214               |                   |
| The Ottawa Hospital - General     | ON       | Mar 1, 2020  | Oct 31, 2020 | Urban         | Teaching |                   | 293               |
| Kingston General Hospital         | ON       | Mar 1, 2020  | Dec 31, 2020 | Urban         | Teaching | 32                |                   |
| Hamilton General Hospital         | ON       | Mar 1, 2020  | Aug 31, 2020 | Urban         | Teaching | 46                |                   |
| Jurviski Hospital                 | ON       | Mar 1, 2020  | Aug 31, 2020 | Urban         | Teaching | 42                |                   |
| Health Science North              | ON       | May 14, 2020 | Jul 25, 2020 | Urban         | NT       | 10                |                   |
| University Hospital - LHSC        | ON       | Mar 1, 2020  | Nov 30, 2020 | Urban         | Teaching | 312               |                   |

Appendix 1, as supplied by the authors. Appendix to: Hohl CM, Rosychuk RJ, Archambault PM, et al. The CCEDRRN COVID-19 Mortality Score to predict death among nonpalliative patients with COVID-19 presenting to emergency departments: a derivation and validation study. *CMAJ Open* 2022. DOI:10.9778/cmajo.20210243. Copyright © 2022 The Author(s) or their employer(s). To receive this resource in an accessible format, please contact us at [cmajgroup.cmajca](mailto:cmajgroup.cmajca).

|                                  |    |              |              |       |          |     |     |
|----------------------------------|----|--------------|--------------|-------|----------|-----|-----|
| Toronto Westem Hospital          | ON | Sep 1, 2020  | Sep 19, 2020 | Urban | Teaching | 76  |     |
| Hôtel-Dieu de Lévis              | QC | Mar 1, 2020  | Nov 17, 2020 | Urban | NT       | 267 |     |
| Jewish General Hospital          | QC | Mar 1, 2020  | May 3, 2020  | Urban | Teaching | 815 |     |
| CHUL                             | QC | Mar 1, 2020  | Nov 15, 2020 | Urban | Teaching |     | 57  |
| Royal Victoria Hospital          | QC | Mar 1, 2020  | Oct 31, 2020 | Urban | Teaching | 789 |     |
| Hôpital de l'Enfant-Jésus        | QC | Mar 1, 2020  | May 4, 2020  | Urban | Teaching | 51  |     |
| Hôpital du Saint-Sacrement       | QC | Mar 1, 2020  | Nov 15, 2020 | Urban | Teaching | 33  |     |
| Hôpital Saint-François d'Assise  | QC | Mar 1, 2020  | Nov 15, 2020 | Urban | Teaching | 56  |     |
| Hôtel-Dieu de Québec             | QC | Mar 1, 2020  | Nov 15, 2020 | Urban | Teaching | 21  |     |
| IUCPQ                            | QC | Mar 1, 2020  | Nov 15, 2020 | Urban | Teaching |     | 312 |
| Hôpital du Sacré-Coeur           | QC | Mar 17, 2020 | Jun 11, 2020 | Urban | Teaching | 664 |     |
| Montreal General Hospital        | QC | Mar 1, 2020  | Nov 30, 2020 | Urban | Teaching | 296 |     |
| Saint John Regional Hospital     | NB | Mar 1, 2020  | Nov 30, 2020 | Urban | Teaching |     | 9   |
| Halifax Infirmary                | NS | Mar 1, 2020  | Nov 24, 2020 | Urban | Teaching | 37  |     |
| Dartmouth General Hospital       | NS | Mar 1, 2020  | Nov 24, 2020 | Com   | NT       | 16  |     |
| Hants Community Hospital         | NS | Mar 1, 2020  | Nov 24, 2020 | Rural | NT       |     | <5  |
| Cobequid Community Health Centre | NS | Mar 1, 2020  | Nov 24, 2020 | Com   | NT       | 11  |     |
| Secondary Assessment Centers     | NS | Mar 26, 2020 | May 15, 2020 | Urban | Teaching |     | 31  |

BC=British Columbia, AB=Alberta, SK=Saskatchewan, ON=Ontario, QC= Québec, NB=New Brunswick, NS= Nova Scotia, LHSC=London Health Sciences Centre, CHUL=Centre Hospitalier de l'Université Laval, IUCPQ=Institut universitaire de cardiologie et de pneumologie de Québec, Com=community

**Table S2.** Candidate variables for entry into regression model

| Variable                                                        | Definition                                                                                                                                                                     | N (%)<br>Missing |
|-----------------------------------------------------------------|--------------------------------------------------------------------------------------------------------------------------------------------------------------------------------|------------------|
| <b>Demographics</b>                                             |                                                                                                                                                                                |                  |
| Age                                                             | Age in years                                                                                                                                                                   | 0 (0)            |
| Sex                                                             | Male, Female, Other                                                                                                                                                            | 0 (0)            |
| Arrival from                                                    |                                                                                                                                                                                | 42 (0.6)         |
|                                                                 | Home + Inter-hospital transfer + other (not clearly documented)                                                                                                                |                  |
|                                                                 | Single room + no fixed address + shelter                                                                                                                                       |                  |
|                                                                 | Institutional living: long-term care/rehab + correctional                                                                                                                      |                  |
| <b>Emergency department variables</b>                           |                                                                                                                                                                                |                  |
| ED arrival mode                                                 |                                                                                                                                                                                | 0 (0)            |
| Ambulance:                                                      | arrived by ambulance                                                                                                                                                           |                  |
| Self/police                                                     | self-transported or transported to ED by police                                                                                                                                |                  |
| Arrival heart rate                                              | beats/minute                                                                                                                                                                   | 131 (1.8)        |
| Arrival respiratory rate                                        | breaths/minute                                                                                                                                                                 | 324 (4.4)        |
| Arrival oxygen saturation                                       | %                                                                                                                                                                              | 131 (1.8)        |
| Arrival systolic blood pressure                                 | mmHg                                                                                                                                                                           | 352 (4.7)        |
| Fever                                                           | Temperature $\geq 37.5$ OR self-reported fever                                                                                                                                 | 0 (0)            |
| Respiratory distress                                            | Increased work of breathing documented by treating clinician and Patient-reported symptom of shortness of breath as documented by treating clinician                           | 0 (0)            |
| Bloodwork in ED                                                 | Yes/No                                                                                                                                                                         |                  |
| Supplemental oxygen delivered in the ED                         | Yes/No                                                                                                                                                                         | 0 (0)            |
| <b>COVID symptoms</b>                                           |                                                                                                                                                                                |                  |
| Chest pain (includes discomfort or tightness)                   | Patient-reported symptom as documented by treating clinician                                                                                                                   | 0 (0)            |
| Chills                                                          | Patient-reported symptom as documented by treating clinician                                                                                                                   | 0 (0)            |
| Cough                                                           | Patient-reported symptom as documented by treating clinician                                                                                                                   | 0 (0)            |
| Dysgeusia/anosmia                                               | Patient-reported symptom as documented by treating clinician                                                                                                                   | 0 (0)            |
| Fatigue/malaise                                                 | Patient-reported symptom as documented by treating clinician                                                                                                                   | 0 (0)            |
| Headache                                                        | Patient-reported symptom as documented by treating clinician                                                                                                                   | 0 (0)            |
|                                                                 | Patient-reported symptom as documented by treating clinician                                                                                                                   | 0 (0)            |
| Hemoptysis (bloody sputum)                                      |                                                                                                                                                                                |                  |
| Muscle aches (myalgia)                                          | Patient-reported symptom as documented by treating clinician                                                                                                                   | 0 (0)            |
| No reported symptoms                                            | Patient-reported symptom as documented by treating clinician                                                                                                                   | 0 (0)            |
| Current tobacco user                                            | Documented current tobacco use                                                                                                                                                 | 0 (0)            |
| Current illicit user                                            | Documented methamphetamine, opioid or other illicit drug use                                                                                                                   | 0 (0)            |
| Pregnant                                                        | Documented current pregnancy                                                                                                                                                   | 0 (0)            |
| Arrival confusion                                               | Patient-reported symptom of altered consciousness/confusion or Glasgow Coma Score of $< 14$                                                                                    | 0 (0)            |
| Covid Symptom-gastric                                           | Patient-reported symptom of diarrhea and nausea/vomiting                                                                                                                       | 0 (0)            |
| Mode of oxygen delivery combined with oxygen received in the ED | Documented mode of oxygen delivery, combined with maximum oxygen received if given nasal prongs. Most invasive method of oxygen delivery selected if more than one documented. | 0 (0)            |
|                                                                 | Intubation                                                                                                                                                                     |                  |
|                                                                 | BiPap + CPAP + HFNO                                                                                                                                                            |                  |
|                                                                 | Facemask + simple rebreather + non-rebreather + nasal prongs with $> 6L/min$                                                                                                   |                  |
|                                                                 | Nasal prongs $< 5L/min$                                                                                                                                                        |                  |
|                                                                 | No oxygen                                                                                                                                                                      |                  |
| <b>Common Comorbid Conditions, n (%)</b>                        |                                                                                                                                                                                |                  |
| Active malignant neoplasm (cancer)                              | The diagnosis, conditions, problem or circumstances for the patient's ED visit that is in addition to the main diagnosis.                                                      | 0 (0)            |
| Coronary artery disease                                         | The diagnosis, conditions, problem or circumstances for the patient's ED visit that is in addition to the main diagnosis.                                                      | 0 (0)            |
| Congestive heart failure                                        | The diagnosis, conditions, problem or circumstances for the patient's ED visit that is in addition to the main diagnosis.                                                      | 0 (0)            |
| Hypertension                                                    | The diagnosis, conditions, problem or circumstances for the patient's ED visit that is in addition to the main diagnosis.                                                      | 0 (0)            |

Appendix 1, as supplied by the authors. Appendix to: Hohl CM, Rosychuk RJ, Archambault PM, et al. The CCEDRRN COVID-19 Mortality Score to predict death among nonpalliative patients with COVID-19 presenting to emergency departments: a derivation and validation study. *CMAJ Open* 2022. DOI:10.9778/cmajo.20210243. Copyright © 2022 The Author(s) or their employer(s). To receive this resource in an accessible format, please contact us at [cmajgroup.cmajca](mailto:cmajgroup.cmajca).

|                               |                                                                                                                           |       |
|-------------------------------|---------------------------------------------------------------------------------------------------------------------------|-------|
| Asthma                        | The diagnosis, conditions, problem or circumstances for the patient's ED visit that is in addition to the main diagnosis. | 0 (0) |
| Chronic kidney disease        | The diagnosis, conditions, problem or circumstances for the patient's ED visit that is in addition to the main diagnosis. | 0 (0) |
| Dialysis                      | The diagnosis, conditions, problem or circumstances for the patient's ED visit that is in addition to the main diagnosis  | 0 (0) |
| Diabetes                      | The diagnosis, conditions, problem or circumstances for the patient's ED visit that is in addition to the main diagnosis  | 0 (0) |
| Moderate/severe liver disease | The diagnosis, conditions, problem or circumstances for the patient's ED visit that is in addition to the main diagnosis  | 0 (0) |
| Organ transplant              | The diagnosis, conditions, problem or circumstances for the patient's ED visit that is in addition to the main diagnosis  | 0 (0) |
| Dementia                      | The diagnosis, conditions, problem or circumstances for the patient's ED visit that is in addition to the main diagnosis  | 0 (0) |
| Rheumatologic disorder        | The diagnosis, conditions, problem or circumstances for the patient's ED visit that is in addition to the main diagnosis  | 0 (0) |
| Obesity (clinical impression) | The diagnosis, conditions, problem or circumstances for the patient's ED visit that is in addition to the main diagnosis  | 0 (0) |
| Atrial fibrillation           | The diagnosis, conditions, problem or circumstances for the patient's ED visit that is in addition to the main diagnosis  | 0 (0) |

**Table S3.** Performance of the CCEDRRN COVID Mortality Score to rule out and rule in in-hospital mortality at different cut-off values in the validation cohort

| Score            | n (%)       | Sensitivity (% <b>, 95% CI)</b> | Specificity (% <b>, 95% CI)</b> | Negative LR | Positive LR | PPV (%) | NPV (%) | Mortality (%) |
|------------------|-------------|---------------------------------|---------------------------------|-------------|-------------|---------|---------|---------------|
| <b>Rule out:</b> |             |                                 |                                 |             |             |         |         |               |
| ≤-1              | 50 (2.3)    | 100 (97.5-100)                  | 2.5 (1.8-3.2)                   | 0.0         | 1.0         | 6.9     | 100     | 0.0           |
| ≤0               | 208 (9.5)   | 100 (97.5-100)                  | 10.2 (8.9-11.6)                 | 0.0         | 1.1         | 7.4     | 100     | 0.0           |
| ≤1               | 363 (16.6)  | 100 (97.5-100)                  | 17.8 (16.2-19.5)                | 0.0         | 1.2         | 8.1     | 100     | 0.0           |
| ≤2               | 458 (21.0)  | 100 (97.5-100)                  | 22.5 (20.7-24.3)                | 0.0         | 1.3         | 8.5     | 100     | 0.0           |
| ≤3               | 576 (26.4)  | 100 (97.5-100)                  | 28.3 (26.3-30.3)                | 0.0         | 1.4         | 9.1     | 100     | 0.0           |
| ≤4               | 689 (31.5)  | 100 (97.5-100)                  | 33.8 (31.8-35.9)                | 0.0         | 1.5         | 9.8     | 100     | 0.0           |
| ≤5               | 866 (39.6)  | 100 (97.5-100)                  | 42.5 (40.3-44.7)                | 0.0         | 1.7         | 11.1    | 100     | 0.0           |
| ≤6               | 1050 (48.1) | 100 (97.5-100)                  | 51.5 (49.3-53.7)                | 0.0         | 2.1         | 13.0    | 100     | 0.0           |
| ≤7               | 1260 (57.7) | 98.6 (95.2-99.8)                | 61.7 (59.6-63.8)                | 0.0         | 2.6         | 15.7    | 100     | 0.2           |
| ≤8               | 1474 (67.5) | 93.9 (88.7-97.2)                | 71.9 (69.9-73.8)                | 0.1         | 3.3         | 19.2    | 99.8    | 0.6           |
| ≤9               | 1669 (76.4) | 85.7 (79.0-90.9)                | 80.9 (79.1-82.6)                | 0.2         | 4.5         | 24.4    | 99.4    | 1.3           |
| ≤10              | 1848 (84.6) | 75.5 (67.7-82.2)                | 88.9 (87.5-90.2)                | 0.3         | 6.8         | 32.9    | 98.7    | 1.9           |
| <b>Rule in:</b>  |             |                                 |                                 |             |             |         |         |               |
| ≥10              | 516 (23.6)  | 85.7 (79.9-90.9)                | 80.9 (79.1-82.6)                | 0.2         | 4.5         | 24.4    | 98.7    | 24.4          |
| ≥11              | 337 (15.4)  | 75.5 (67.7-82.2)                | 88.9 (87.5-90.2)                | 0.3         | 6.8         | 32.9    | 98.1    | 32.9          |
| ≥12              | 212 (9.7)   | 60.5 (52.2-68.5)                | 94.0 (92.8-95)                  | 0.4         | 10.0        | 42.0    | 97.1    | 42.0          |
| ≥13              | 100 (4.6)   | 34.0 (26.4-42.3)                | 97.5 (96.8-98.2)                | 0.7         | 13.9        | 50.0    | 95.3    | 50.0          |
| ≥14              | 37 (1.7)    | 18.4 (12.5-25.6)                | 99.5 (99.1-99.8)                | 0.8         | 37.4        | 73.0    | 94.4    | 73.0          |
| ≥15              | 17 (0.8)    | 8.8 (4.8-14.6)                  | 99.8 (99.5-99.9)                | 0.9         | 45.1        | 76.5    | 93.8    | 76.5          |
| ≥16              | 4 (0.2)     | 2.7 (0.7-6.8)                   | 100 (99.8-100)                  | 1.0         | -           | 100.0   | 93.4    | 100.0         |
| ≥17              | 1 (0.0)     | 0.7 (0.3-7)                     | 100 (99.8-100)                  | 1.0         | -           | 100.0   | 93.3    | 100.0         |

LR=Likelihood ratio, FN=false negative, FP=false positive, NPV=negative predictive value, PPV=positive predictive value, TN=true negative, TP=true positive.

**Table S4.** Receiver operator curves and area under the curve (AUC) for the CCEDRRN COVID Mortality Score, the SEIMC score, the 4C Mortality Score, and the VACO Index

| Model                                 | Data set                  | Patients with required parameters (n) | AUC (95% CI)     |
|---------------------------------------|---------------------------|---------------------------------------|------------------|
| CCEDRRN COVID Mortality Score (CCMS)  | Derivation and Validation | 9605                                  | 0.92 (0.91-0.93) |
| CCEDRRN COVID Mortality Score (CCMS)  | Validation                | 2185                                  | 0.92 (0.90-0.93) |
| SEIMC score (Berenguer et al.)(11)    | Validation                | 1620                                  | 0.88 (0.86-0.91) |
| 4C Mortality Score (Knight et al.)(9) | Validation                | 610                                   | 0.88 (0.84-0.92) |
| VACO Index (King et al.)(37)          | Validation                | 2185                                  | 0.87 (0.84-0.89) |

SEIMC score: the estimated glomerular filtration rate was calculated without race.

4C Mortality Score: human immunodeficiency virus, AIDS, and connective tissue disease, and urea not included.

VACO Index: race, body mass index, acquired immunodeficiency syndrome (AIDS), diabetes with complications, peptic ulcer disease, peripheral vascular disease, and plegia not included.

**Table S5.** Predicted risk for each value of the CCEDRRN COVID Mortality Score (CCMS) based on the model with only the CCMS as a predictor (i.e.,  $\text{expected risk} = \exp(-9.049 + 0.652 \cdot \text{CCMS}) / (1 + \exp(-9.049 + 0.652 \cdot \text{CCMS}))$ )

| Score | Predicted Risk |
|-------|----------------|
| -1    | 0.0001         |
| 0     | 0.0001         |
| 1     | 0.0002         |
| 2     | 0.0004         |
| 3     | 0.0008         |
| 4     | 0.0016         |
| 5     | 0.0031         |
| 6     | 0.0058         |
| 7     | 0.0112         |
| 8     | 0.0212         |
| 9     | 0.0399         |
| 10    | 0.0739         |
| 11    | 0.1327         |
| 12    | 0.2271         |
| 13    | 0.3605         |
| 14    | 0.5197         |
| 15    | 0.6750         |
| 16    | 0.7995         |
| 17    | 0.8844         |

**Figure S1.** Distribution and performance of the CCEDRRN COVID Mortality Score in the derivation cohort: A) distribution of the score, B) observed in-hospital mortality across the range of the score, C) predicted versus observed probability of in-hospital mortality, and D) receiver operating characteristic curve with area under the curve (AUC) and associated 95% confidence interval.

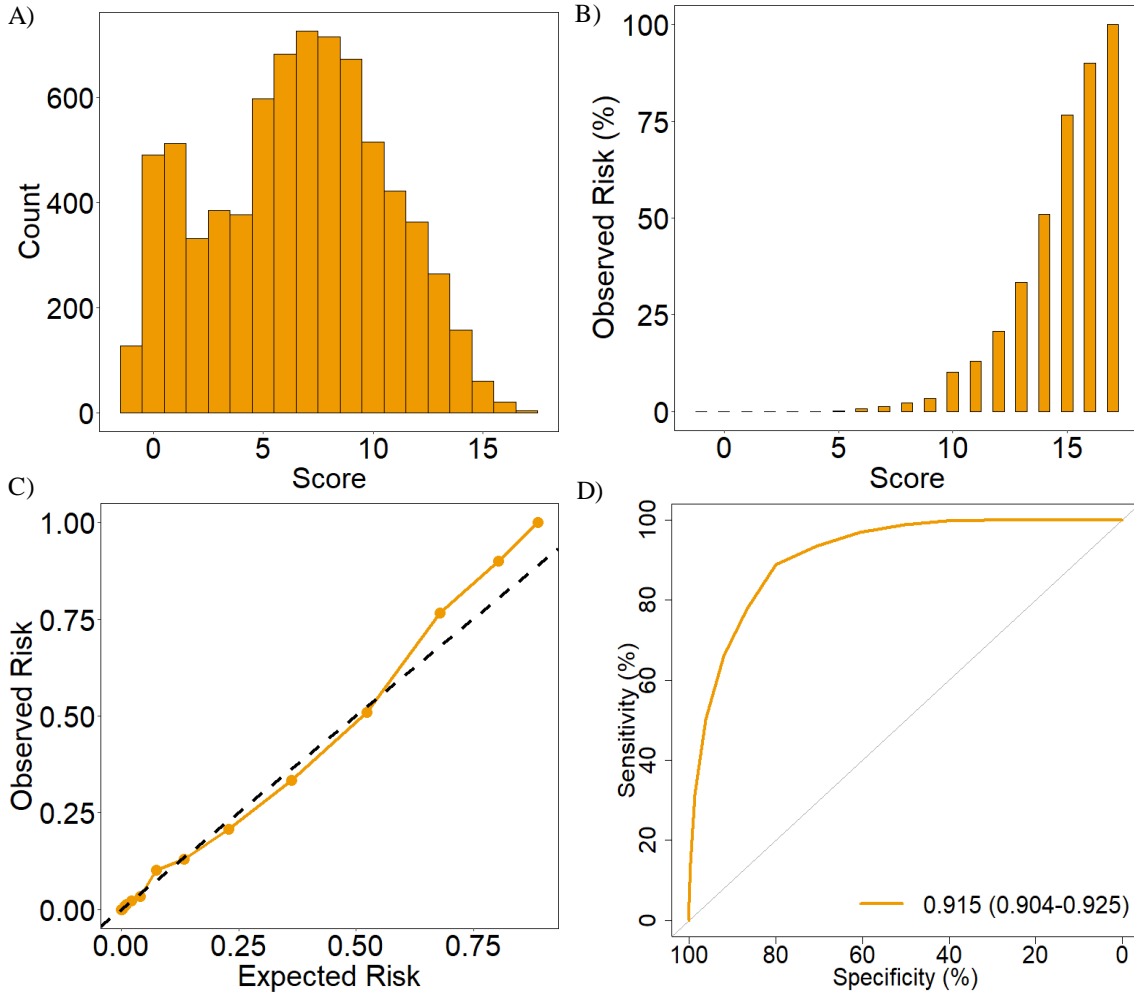



**Figure S2.** Receiver operator curves and area under the curve (AUC) for the CCEDRRN COVID Mortality Score in the derivation and validation cohorts, the SEIMC score (Berenguer et al.),(11) the 4C Mortality Score (Knight et al.),(9) and the VACO Index (King et al.) in the validation cohort.(37)

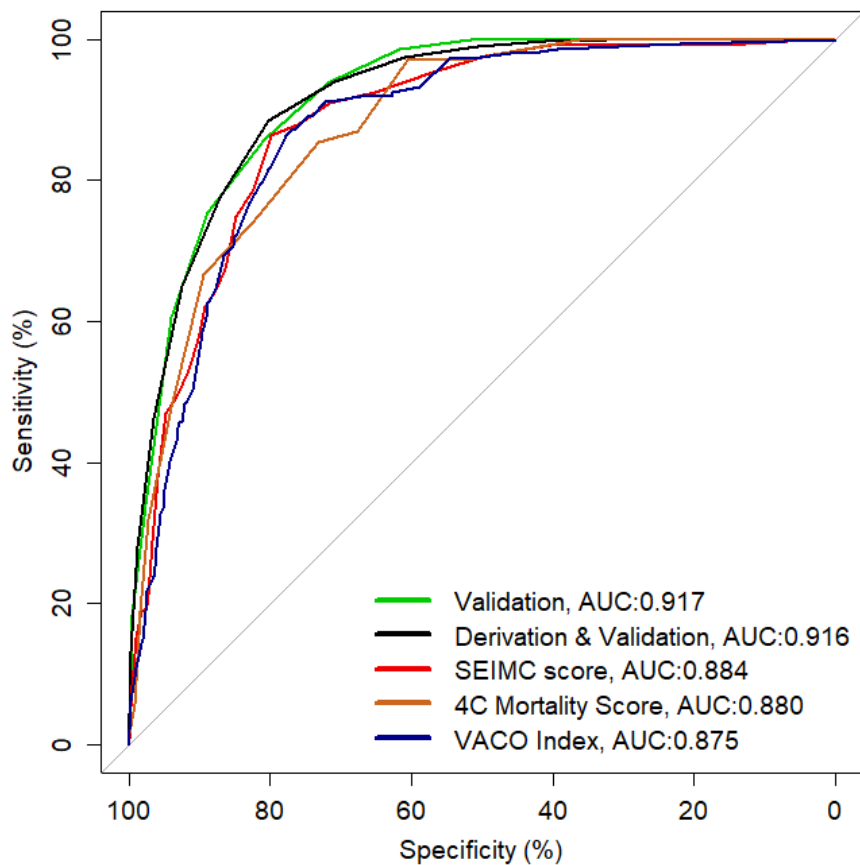

Supplement: 2021-0243-1-at.pdf [file 2021-0243-1-at.pdf]
